# Supplementary material for: SERS Platform Based on Hollow-Core Microstructured Optical Fiber: Technology of UV-Mediated Gold Nanoparticle Growth
Source: MDPI journal article supplement (doi:10.3390/bios12010019), 2021-12-31
Supplement: s1 [file s1]

# SERS Platform Based on Hollow-Core Microstructured Optical Fiber: Technology of UV-Mediated Gold Nanoparticle Growth

Anastasiia A. Merdalimova <sup>1,\*</sup>, Polina G. Rudakovskaya <sup>1</sup>, Timur I. Ermatov <sup>1</sup>, Alexander S. Smirnov <sup>2</sup>, Sergey S. Kosolobov <sup>2</sup>, Julia S. Skibina <sup>3</sup>, Polina A. Demina <sup>4,5</sup>, Boris N. Khlebtsov <sup>6</sup>, Alexey M. Yashchenok <sup>1</sup> and Dmitry A. Gorin <sup>1,\*</sup>

**Table S1.** R6G Raman and SERS peaks assignment and enhancement factor (EF) for SERS substrates on planar slides.

| Ra-<br>man<br>shift,<br>cm <sup>-1</sup> | Peak assignment [1]         | Intensity, counts |                         |                          | EF         |             |
|------------------------------------------|-----------------------------|-------------------|-------------------------|--------------------------|------------|-------------|
|                                          |                             | R6G, 20 mM        | Slide-AuNP + R6G 0.2 mM | Slide-Au-UV + R6G 0.2 mM | Slide-AuNP | Slide-Au-UV |
| 613                                      | C–C–C ring in-plane bending | 169               | 1381                    | 22492                    | 817        | 13309       |
| 775                                      | C–H out-of-plane bending    | 99                | 569                     | 9124                     | 575        | 9216        |
| 1185                                     | C–H in-plane bending        | 80                | 762                     | 8726                     | 953        | 10908       |
| 1312                                     | aromatic C–C stretching     | 97                | 972                     | 12814                    | 1002       | 13210       |
| 1362                                     | aromatic C–C stretching     | 163               | 1392                    | 20497                    | 854        | 12575       |
| 1509                                     | aromatic C–C stretching     | 160               | 1180                    | 22051                    | 738        | 13782       |
| 1574                                     | aromatic C–C stretching     | 48                | 289                     | 6405                     | 602        | 13344       |
| 1650                                     | aromatic C–C stretching     | 79                | 823                     | 10502                    | 1042       | 13294       |

**Table S2.** R6G Raman and SERS peaks assignment and enhancement factor (EF) for SERS substrates on Hollow-Core Microstructured Optical Fiber (HC-MOF). A protocol for Step-by-step process of HC-MOF SERS substrate fabrication.

| MOF-Bare + R6G                |                   | MOF-Au-UV + R6G               |                   | EF   |
|-------------------------------|-------------------|-------------------------------|-------------------|------|
| Raman shift, cm <sup>-1</sup> | Intensity, counts | Raman shift, cm <sup>-1</sup> | Intensity, counts |      |
| 613                           | 67                | 625                           | 950               | 14,2 |
| 775                           | 34                | 773                           | 197               | 5,8  |
| 1183                          | 33                | 1207                          | 506               | 15,3 |
| 1312                          | 41                | -                             | -                 | -    |
| 1364                          | 85                | 1357                          | 923               | 10,9 |
| 1512                          | 71                | 1501                          | 747               | 10,5 |
| 1654                          | 26                | 1644                          | 453               | 17,4 |

## Step-by-step process of HC-MOF SERS substrate fabrication

1. Transmission spectrum measurement of initial 6 cm HC-MOFs;
2. Plasma treatment for 2 min to clean and activate surfaces;
3. PEi delivery at concentration 2 mg/mL for 7 min at speed 150 mL/min using a peristaltic pump;
4. 2 min wash by deionized water;
5. Air blowing with a syringe and air dry at room temperature;
6. Transmission spectrum measurement;
7. THPC AuNP seeds deposition overnight (14h) at speed 150 mL/min using a peristaltic pump;
8. 2 min wash by deionized water;

9. Air blowing with a syringe and air dry at room temperature;
10. Transmission spectrum measurement;
11. Cutting HC-MOFs to 2 pieces with length 2.5-2.8 cm;
12. Transmission spectrum measurement, as it may differ in cut pieces compared to initial fibers due to nonuniformity in layer formation;
13. Capillary filling with a mixture of 1% chloroauric acid and 1% trisodium citrate in 2:1 *v/v* and irradiation by a UV lamp for 2 h, being left in a vial with the solution for continuous solution supply during evaporation;
14. Drying at 50 C overnight;
15. Water washing and air blowing with a syringe;
16. Transmission spectrum measurement.

Here, steps of drying and transmission measurement (1, 5-6, 9-10, 12, 16) are additional steps for layer deposition control. Steps 11-12 related to fiber cutting are optional, as allow to get more samples for independent UV irradiation where parameters may be varied for technology optimization. However, the samples should be cut somewhere before Raman/SERS measurement, as 2.8 cm is a maximum size that is technologically suitable to mount to the available backscattering Raman spectrometer setup.

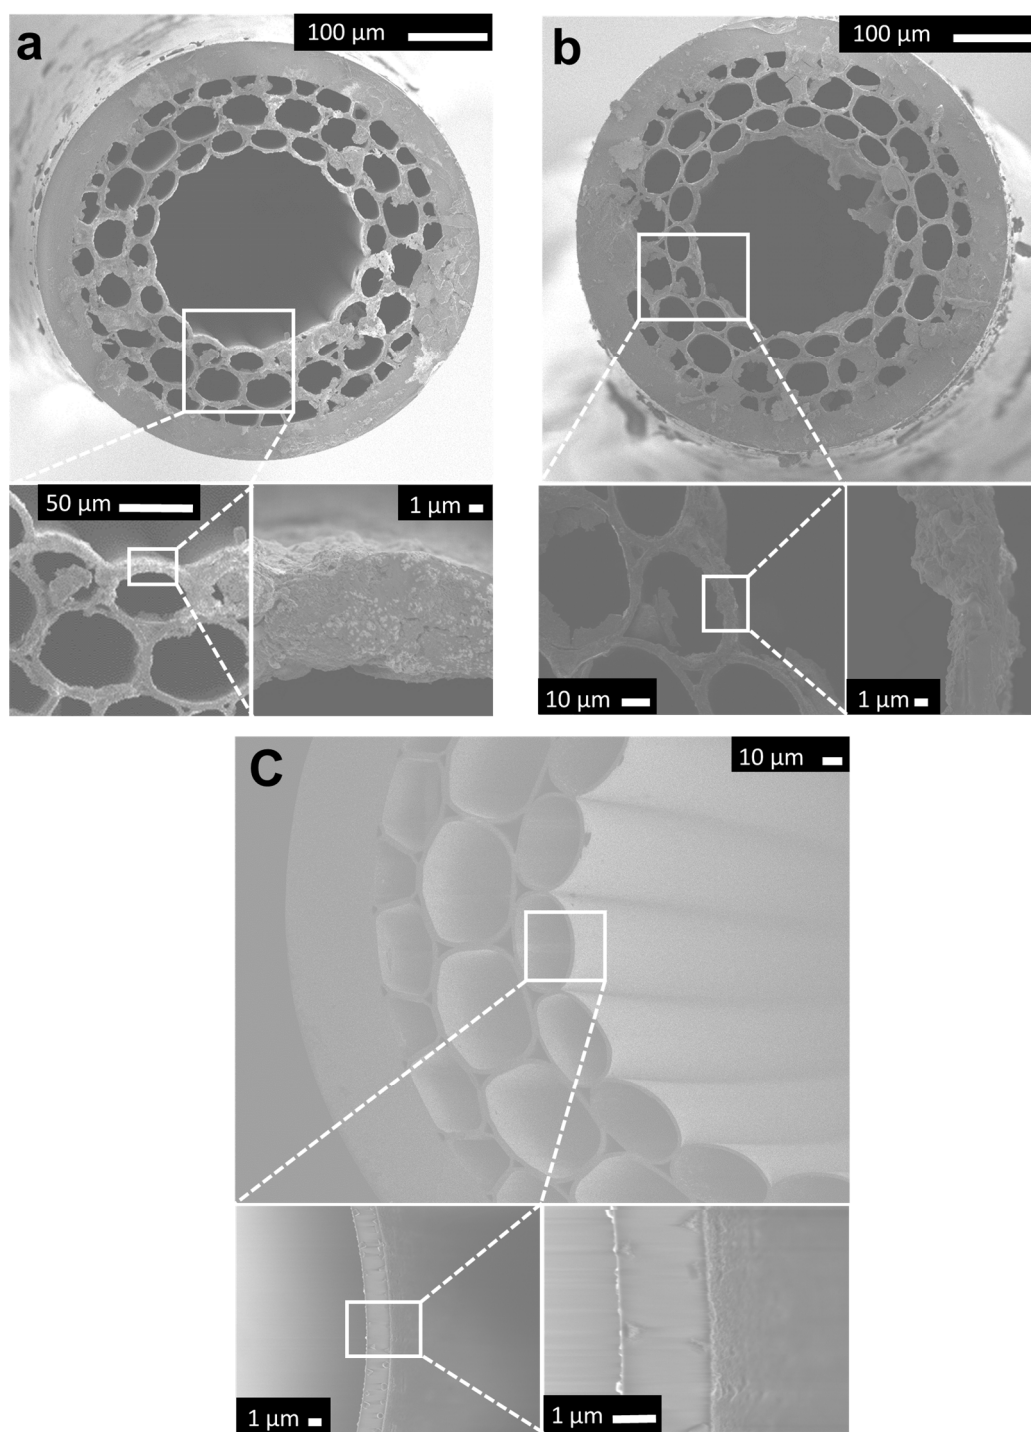

**Figure S1.** SEM images of the tip, end and middle sections of the fabricated HC-MOF sensors.

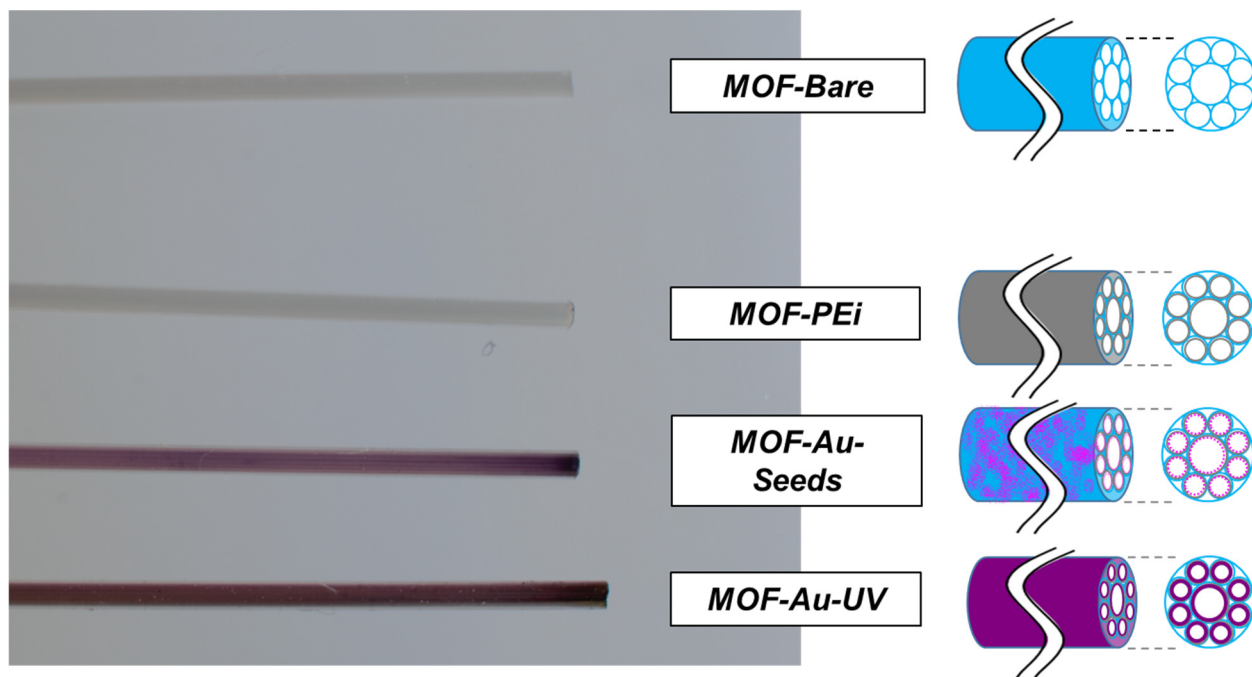

**Figure S2.** Macro photos of HC-MOFs on different stages of SERS substrate fabrication.

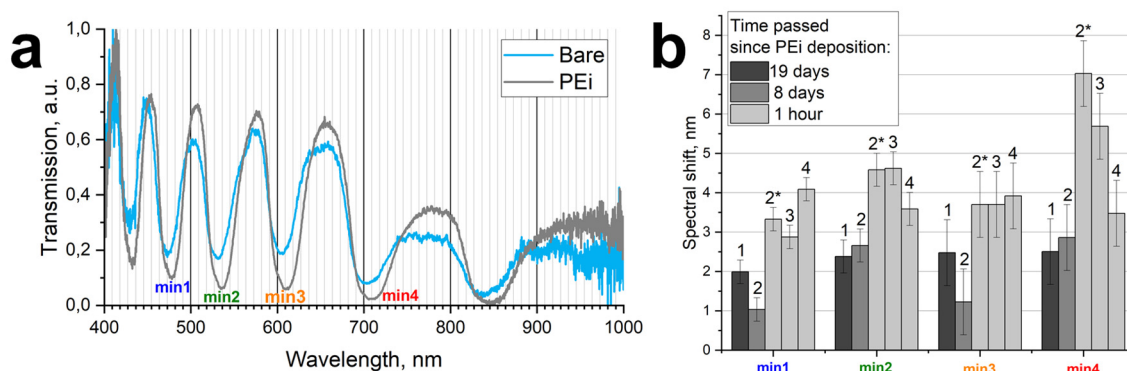

**Figure S3.** Shifts in transmission spectra induced by PEi: (a) transmission spectra of the same HC-MOF before and after PEi deposition, with positions of minima selected for analysis labeled as min1...min4 ; (b) shifts in transmission spectra induced by PEi to a set of HC-MOFs.
